# Supplementary material for: Methylation of HPV and a tumor suppressor gene reveals anal cancer and precursor lesions
Source: PubMed Central journal article supplement (PMC5584159; doi:10.18632/oncotarget.17984), 2017-05-18
Supplement: oncotarget-08-50510-s001.pdf [file oncotarget-08-50510-s001.pdf]

# Methylation of HPV and a tumor suppressor gene reveals anal cancer and precursor lesions

## Supplementary Materials

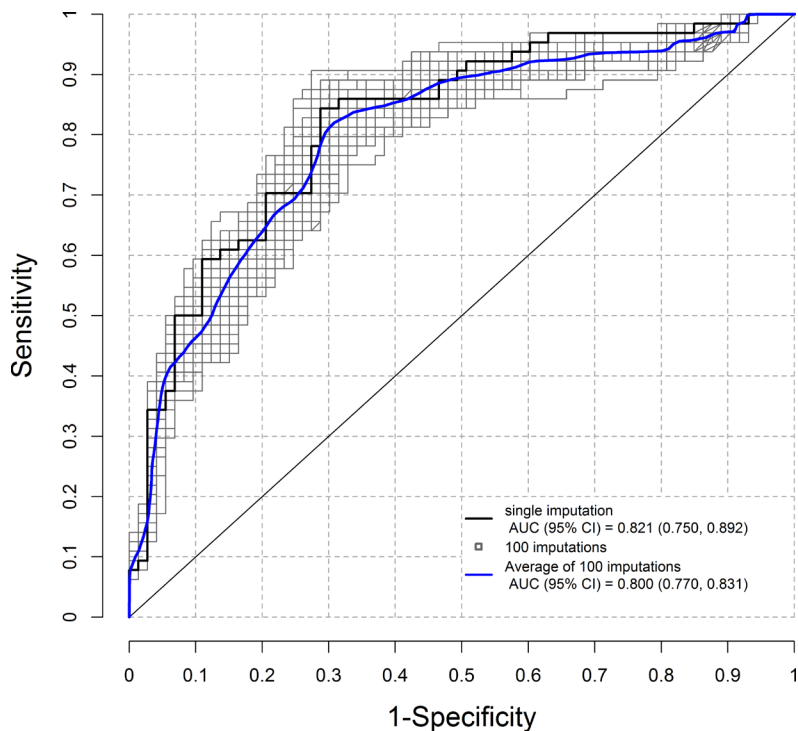

**Supplementary Figure 1: Receiver operator characteristic and area under the curve (AUC, 95% CI) of the DNAm score calculated from the single-imputed data set (black), 100 imputed data set (grey) and the average of the 100 imputations (blue).**

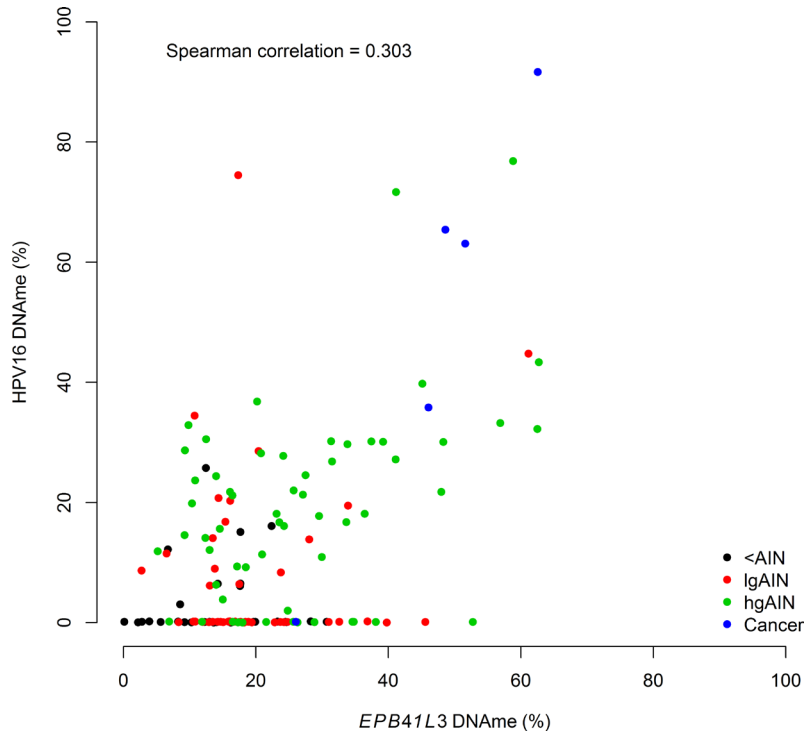

**Supplementary Figure 2: Scatterplot of HPV16 versus *EPB41L3* DNA methylation stratified by histopathological diagnosis.**

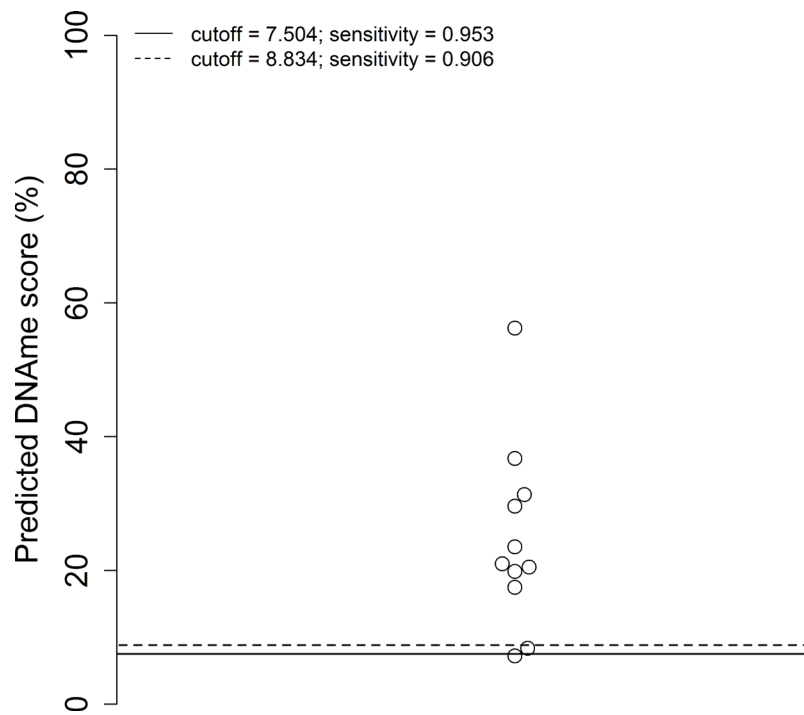

**Supplementary Figure 3: Dot plot of the DNAm score ( $0.561 \cdot \text{HPV16} + 0.439 \cdot \text{EPB41L3}$ ) calculated for the 11 high-grade perianal samples.**

HPV 16 positive  
n= 83, >lgAIN = 53  
IQR-OR (95%CI) = 4.001 (1.785, 8.966)  
Model L.R. = 18.909, p-value = 1.371e-05  
AUC (95% CI): 0.808 (0.703, 0.912)  
Cutoff = 8.834  
Sensitivity = 0.943 (95% CI: 0.887-1.000)  
Specificity = 0.400 (95% CI: 0.233-0.567)

HPV 16 negative  
n= 54, >lgAIN = 11  
IQR-OR (95%CI) = 1.971 (0.217, 17.91)  
Model L.R. = 0.36, p-value = 0.549  
AUC (95% CI): 0.609 (0.417, 0.801)  
Cutoff = 8.834  
Sensitivity = 0.727 (95% CI: 0.455-1.000)  
Specificity = 0.581 (95% CI: 0.442-0.721)

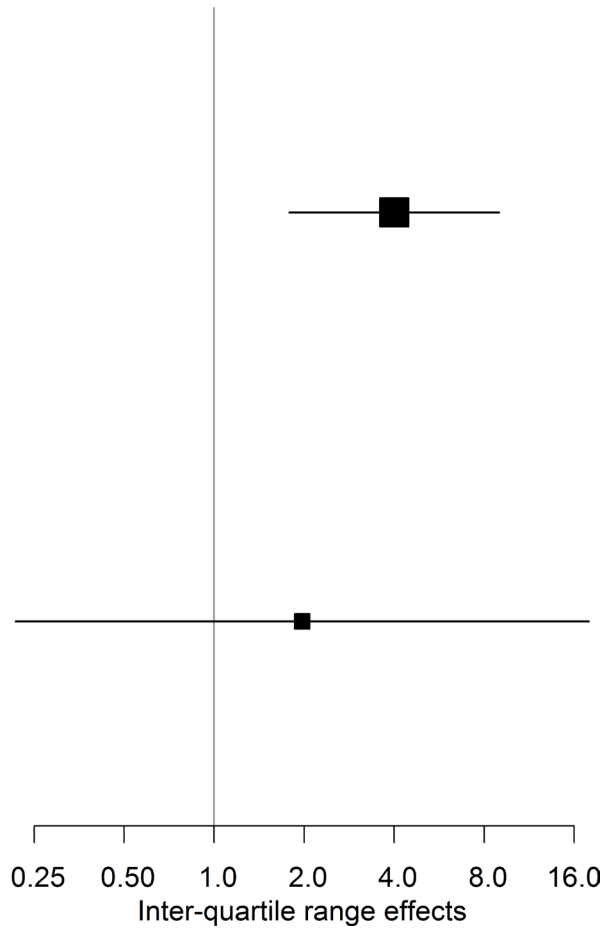

**Supplementary Figure 4: Forest plot of the DName score stratified by HPV16 positivity for detecting hgAIN and cancer.**

**Supplementary Table 1: Demographic variables of samples used in the study**

| Region               | Grade      | Gender  | HIV-negative | HIV-positive | HIV-not tested | hrHPV-negative | hrHPV-positive | Age Median [IQR] |
|----------------------|------------|---------|--------------|--------------|----------------|----------------|----------------|------------------|
| 137 Anal biopsies    | <AIN = 30  | M = 22  | 9 (41)       | 8 (36)       | 5 (23)         | 8 (36)         | 14 (64)        | 41.0 [12.0]      |
|                      |            | F = 7   | 5 (72)       | 0 (0)        | 2 (28)         | 1 (14)         | 6 (86)         |                  |
|                      |            | U = 1   | 0 (0)        | 0 (0)        | 1 (100)        | 1 (100)        | 0 (0)          |                  |
|                      | lgAIN = 43 | M = 40  | 8 (20)       | 32 (80)      | 0 (0)          | 14 (35)        | 26 (65)        | 43.0 [11.5]      |
|                      |            | F = 3   | 3 (100)      | 0 (0)        | 0 (0)          | 0 (0)          | 3 (100)        |                  |
|                      | hgAIN = 59 | M = 46  | 5 (11)       | 40 (87)      | 1 (2)          | 4 (9)          | 42 (91)        | 48.0 [19.5]      |
|                      |            | F = 13  | 7 (54)       | 2 (15)       | 4 (31)         | 1 (8)          | 12 (92)        |                  |
|                      | Cancer = 5 | M = 4   | 1 (25)       | 3 (75)       | 0 (0)          | 0 (0)          | 4 (100)        | 59.0 [6.0]       |
| F = 1                |            | 1 (100) | 0 (0)        | 0 (0)        | 0 (0)          | 1 (100)        |                |                  |
| 11 Perianal biopsies | hgAIN = 11 | M = 4   | 0 (0)        | 4 (100)      | 0 (0)          | 0 (0)          | 4 (100)        | 46.0 [13.5]      |
|                      |            | F = 7   | 1 (14)       | 5 (72)       | 1 (14)         | 0 (0)          | 7 (100)        |                  |

The table shows the number (percentage) of samples that were HIV negative, positive or not tested and hrHPV negative and positive. AIN: anal intraepithelial neoplasia, lg: low-grade, hg: high-grade, F: female, M: male, U: unrecorded gender, HIV: human immunodeficiency virus, hrHPV: high-risk HPV, HPV: human papillomavirus, IQR: interquartile range.

**Supplementary Table 2: Number (percentage) of missing values for the six investigated markers on the 148 biopsies**

| Marker         | Anal, <i>n</i> = 137 | Perianal, <i>n</i> = 11 |
|----------------|----------------------|-------------------------|
| <i>EPB41L3</i> | 6 (4)                | 0 (0)                   |
| HPV16me L1     | 22 (16)              | 4 (36)                  |
| HPV16me L2     | 31 (23)              | 1 (9)                   |
| HPV18me        | 5 (4)                | 3 (27)                  |
| HPV31me        | 11 (8)               | 0 (0)                   |
| HPV33me        | 0 (0)                | 0 (0)                   |

HPV16, HPV18, HPV31 or HPV33 DNA was detected in the samples but the methylation assays failed.
